# Supplementary material
Source: Elsevier journal article supplement (https://rcastoragev2.blob.core.windows.net/962b2919ec86d74c3337ff82f93cfb31/mmc1.pdf)
Supplement: mmc1 [file mmc1.pdf]

**Supplemental information**

**Circulating SARS-CoV-2 spike N439K variants**

**maintain fitness while evading**

**antibody-mediated immunity**

**Emma C. Thomson, Laura E. Rosen, James G. Shepherd, Roberto Spreafico, Ana da Silva Filipe, Jason A. Wojcechowskyj, Chris Davis, Luca Piccoli, David J. Pascall, Josh Dillen, Spyros Lytras, Nadine Czudnochowski, Rajiv Shah, Marcel Meury, Natasha Jesudason, Anna De Marco, Kathy Li, Jessica Bassi, Aine O'Toole, Dora Pinto, Rachel M. Colquhoun, Katja Culap, Ben Jackson, Fabrizia Zatta, Andrew Rambaut, Stefano Jaconi, Vattipally B. Sreenu, Jay Nix, Ivy Zhang, Ruth F. Jarrett, William G. Glass, Martina Beltramello, Kyriaki Nomikou, Matteo Pizzuto, Lily Tong, Elisabetta Cameroni, Tristan I. Croll, Natasha Johnson, Julia Di Iulio, Arthur Wickenhagen, Alessandro Ceschi, Aoife M. Harbison, Daniel Mair, Paolo Ferrari, Katherine Smollett, Federica Sallusto, Stephen Carmichael, Christian Garzoni, Jenna Nichols, Massimo Galli, Joseph Hughes, Agostino Riva, Antonia Ho, Marco Schiuma, Malcolm G. Semple, Peter J.M. Openshaw, Elisa Fadda, J. Kenneth Baillie, John D. Chodera, The ISARIC4C Investigators, the COVID-19 Genomics UK (COG-UK) Consortium, Suzannah J. Rihn, Samantha J. Lycett, Herbert W. Virgin, Amalio Telenti, Davide Corti, David L. Robertson, and Gyorgy Snell**

**Table S1. Details of the *Sarbecovirus* sequences related to STAR Methods section “RBM variability across *Sarbecoviruses*” and Figure S2. The top 8 sequences shaded in gray were used for the % identity sliding window plot and all 69 sequences were used for the entropy plot.**

| Virus                   | Host                        | Collection place     | Accession      | Collection time | GISAD acknowledgments                                                                |
|-------------------------|-----------------------------|----------------------|----------------|-----------------|--------------------------------------------------------------------------------------|
| Wuhan-Hu-1 [SARS-CoV-2] | human                       | Wuhan                | MN908947       | 2020-12-19      |                                                                                      |
| WIV1                    | Bat-R_sinicus               | Yunnan-Kunming       | KF367457       | 2020-09-12      |                                                                                      |
| HSZ-Cc [SARS-CoV-1]     | human                       | Guangzhou            | AY394995       | 1905-06-24      |                                                                                      |
| RaTG13                  | Bat-R_affinis               | Yunnan               | EPI_ISL_402131 | 2013-07-24      | Yan Zhu; Ping Yu; Bei Li; Ben Hu; Hao-Rui Si; Xing-Lou Yang; Peng Zhou; Zheng-Li Shi |
| GD Pangolin             | pangolin                    | Guandong             | EPI_ISL_410721 | 2020-02-16      | Yongyi Shen; Lihua Xiao; Wu Chen                                                     |
| GX Pangolin             | pangolin                    | Guangxi              | EPI_ISL_410539 | 1905-07-09      | Wu-Chun Cao; Tommy Tsan-Yuk Lam; Na Jia; Ya-Wei Zhang; Jia-Fu Jiang; Bao-Gui Jiang   |
| BtKY72                  | Bat-R_spp                   | Kenya                | KY352407       | 2020-10-07      |                                                                                      |
| BM48-31                 | Bat-R_blasii                | Bulgaria             | NC_014470      | 2020-04-08      |                                                                                      |
| P4L                     | pangolin                    | Guangxi              | EPI_ISL_410538 | 1905-07-09      | Wu-Chun Cao; Tommy Tsan-Yuk Lam; Na Jia; Ya-Wei Zhang; Jia-Fu Jiang; Bao-Gui Jiang   |
| P5L                     | pangolin                    | Guangxi              | EPI_ISL_410540 | 1905-07-09      | Wu-Chun Cao; Tommy Tsan-Yuk Lam; Na Jia; Ya-Wei Zhang; Jia-Fu Jiang; Bao-Gui Jiang   |
| P5E                     | pangolin                    | Guangxi              | EPI_ISL_410541 | 1905-07-09      | Wu-Chun Cao; Tommy Tsan-Yuk Lam; Na Jia; Ya-Wei Zhang; Jia-Fu Jiang; Bao-Gui Jiang   |
| P2V                     | pangolin                    | Guangxi              | EPI_ISL_410542 | 1905-07-09      | Wu-Chun Cao; Tommy Tsan-Yuk Lam; Na Jia; Ya-Wei Zhang; Jia-Fu Jiang; Bao-Gui Jiang   |
| RmYN02                  | Bat-R_malayanus             | Yunnan-Xishuangbanna | EPI_ISL_412977 | 2019-06-25      | Weifeng Shi; Tao Hu; Hong Zhou; Juan Li; Xing Chen; Alice Catherine Hughes; Yuhai Bi |
| RpShaanxi2011           | Bat-R_pusillus              | Shaanxi              | JX993987       | 2020-09-11      |                                                                                      |
| HuB2013                 | Bat-R_sinicus               | Hubei                | KJ473814       | 2020-04-13      |                                                                                      |
| GX2013                  | Bat-R_sinicus               | Guangxi              | KJ473815       | 2020-11-12      |                                                                                      |
| Rs4231                  | Bat-R_sinicus               | Yunnan-Kunming       | KY417146       | 2013-04-17      |                                                                                      |
| Rs4255                  | Bat-R_sinicus               | Yunnan-Kunming       | KY417149       | 2013-04-17      |                                                                                      |
| Rs4237                  | Bat-R_sinicus               | Yunnan-Kunming       | KY417147       | 2013-04-17      |                                                                                      |
| Rs4247                  | Bat-R_sinicus               | Yunnan-Kunming       | KY417148       | 2013-04-17      |                                                                                      |
| YN2018B                 | Bat-R_affinis               | Yunnan               | MK211376       | 2020-09-16      |                                                                                      |
| YN2018D                 | Bat-R_affinis               | Yunnan               | MK211378       | 2020-09-16      |                                                                                      |
| Rs7327                  | Bat-R_sinicus               | Yunnan-Kunming       | KY417151       | 2014-10-24      |                                                                                      |
| Rs9401                  | Bat-R_sinicus               | Yunnan-Kunming       | KY417152       | 2015-10-16      |                                                                                      |
| RsSHC014                | Bat-R_sinicus               | Yunnan-Kunming       | KC881005       | 2011-04-17      |                                                                                      |
| Rs3367                  | Bat-R_sinicus               | Yunnan-Kunming       | KC881006       | 2012-03-19      |                                                                                      |
| YN2018C                 | Bat-R_affinis               | Yunnan-Kunming       | MK211377       | 2020-09-16      |                                                                                      |
| As6526                  | Bat-Aselliscus_stoliczkanus | Yunnan-Kunming       | KY417142       | 2014-05-12      |                                                                                      |
| Rs4081                  | Bat-R_sinicus               | Yunnan-Kunming       | KY417143       | 2012-09-18      |                                                                                      |
| Anlong-103              | Bat-R_sinicus               | Guizhou-Anlong       | KY770858       | 1905-07-05      |                                                                                      |
| Anlong-112              | Bat-R_sinicus               | Guizhou-Anlong       | KY770859       | 1905-07-05      |                                                                                      |
| YN2018A                 | Bat-R_affinis               | Yunnan               | MK211375       | 2020-09-16      |                                                                                      |
| YN2013                  | Bat-R_sinicus               | Yunnan               | KJ473816       | 2020-12-10      |                                                                                      |
| WIV16                   | Bat-R_sinicus               | Yunnan-Kunming       | KT444582       | 2013-07-21      |                                                                                      |
| Rs4874                  | Bat-R_sinicus               | Yunnan-Kunming       | KY417150       | 2013-07-21      |                                                                                      |
| Rf4092                  | Bat-R_ferrumequinum         | Yunnan-Kunming       | KY417145       | 2012-09-18      |                                                                                      |
| F46                     | Bat-R_pusillus              | Yunnan               | KU973692       | 1905-07-04      |                                                                                      |
| Rs672                   | Bat-R_sinicus               | Guizhou              | FJ588686       | 2020-09-06      |                                                                                      |
| Rs4084                  | Bat-R_sinicus               | Yunnan-Kunming       | KY417144       | 2012-09-18      |                                                                                      |
| Rp3                     | Bat-R_pearsoni              | Guangxi-Nanning      | DQ071615       | 2020-12-04      |                                                                                      |
| YNLF_31C                | Bat-R_ferrumequinum         | Yunnan-Lufeng        | KP886808       | 2013-05-23      |                                                                                      |
| YNLF_34C                | Bat-R_ferrumequinum         | Yunnan-Lufeng        | KP886809       | 2013-05-23      |                                                                                      |
| LYRa11                  | Bat-R_affinis               | Yunnan-Baoshan       | KF569996       | 1905-07-03      |                                                                                      |
| HKU3-1                  | Bat-R_sinicus               | Hong_Kong            | DQ022305       | 2005-02-17      |                                                                                      |
| HKU3-3                  | Bat-R_sinicus               | Hong_Kong            | DQ084200       | 2005-03-17      |                                                                                      |
| HKU3-2                  | Bat-R_sinicus               | Hong_Kong            | DQ084199       | 2005-02-24      |                                                                                      |
| HKU3-5                  | Bat-R_sinicus               | Hong_Kong            | GQ153540       | 2005-09-20      |                                                                                      |
| HKU3-10                 | Bat-R_sinicus               | Hong_Kong            | GQ153545       | 2006-10-28      |                                                                                      |
| HKU3-9                  | Bat-R_sinicus               | Hong_Kong            | GQ153544       | 2006-10-28      |                                                                                      |
| HKU3-11                 | Bat-R_sinicus               | Hong_King            | GQ153546       | 2007-03-07      |                                                                                      |
| HKU3-13                 | Bat-R_sinicus               | Hong_Kong            | GQ153548       | 2007-11-15      |                                                                                      |
| HKU3-6                  | Bat-R_sinicus               | Hong_Kong            | GQ153541       | 2005-12-16      |                                                                                      |
| HKU3-4                  | Bat-R_sinicus               | Hong_Kong            | GQ153539       | 2005-07-20      |                                                                                      |
| HKU3-12                 | Bat-R_sinicus               | Hong_Kong            | GQ153547       | 2007-05-15      |                                                                                      |
| HKU3-7                  | Bat-R_sinicus               | Guangdong            | GQ153542       | 2006-02-15      |                                                                                      |
| HKU3-8                  | Bat-R_sinicus               | Guangdong            | GQ153543       | 2006-02-15      |                                                                                      |
| HeB2013                 | Bat-R_ferrumequinum         | Hebei                | KJ473812       | 2020-04-13      |                                                                                      |
| Jiyuan-84               | Bat-R_ferrumequinum         | Henan-Jiyuan         | KY770860       | 1905-07-04      |                                                                                      |
| SX2013                  | Bat-R_ferrumequinum         | Shanxi               | KJ473813       | 2020-11-13      |                                                                                      |
| Rf1                     | Bat-R_ferrumequinum         | Hubei-Yichang        | DQ412042       | 2020-11-04      |                                                                                      |
| SC2018                  | Bat-R_spp                   | Sichuan              | MK211374       | 2020-10-16      |                                                                                      |
| Yunnan2011              | Bat-Chaerephon_plicata      | Yunnan               | JX993988       | 2020-11-11      |                                                                                      |
| Longquan_140            | Bat-R_monoceros             | China                | KF294457       | 1905-07-04      |                                                                                      |
| JI2012                  | Bat-R_ferrumequinum         | Jilin                | KJ473811       | 2179-04-18      |                                                                                      |
| JTMC15                  | Bat-R_ferrumequinum         | Jilin                | KU182964       | 2020-10-13      |                                                                                      |
| 279_2005                | Bat-R_macrotis              | Hubei                | DQ648857       | 2020-11-04      |                                                                                      |
| Rm1                     | Bat-R_macrotis              | Hubei                | DQ412043       | 2020-11-04      |                                                                                      |
| CoVZC45                 | Bat-R_sinicus               | Zhoushan-Dinghai     | MG772933       | 2020-02-17      |                                                                                      |
| CoVZXC21                | Bat-R_sinicus               | Zhoushan-Dinghai     | MG772934       | 2020-07-15      |                                                                                      |

**Table S2. Sequence counts by country, related to Figure 3**

N439K variant counts and numbers of SARS-CoV-2 genomes sequenced by country were retrieved from GISAID on January 6, 2021. Cumulative confirmed positive cases were retrieved from the WHO Coronavirus Disease (COVID-19) Dashboard (<https://covid19.who.int>) and for the UK countries from UK government data (<https://coronavirus.data.gov.uk/details/cases>) to January 6, 2021. N439K % sequenced = N439K counts divided by total genomes sequenced. Genomes sequenced % positives = total genomes sequenced divided by confirmed positive cases for each country. N439K estimated positive cases = % N439K sequenced multiplied by confirmed positive cases.

| Country                | N439K  |             | Genomes sequenced |             | Confirmed positive cases |                 |
|------------------------|--------|-------------|-------------------|-------------|--------------------------|-----------------|
|                        | counts | % sequenced | counts            | % positives | total reported           | N439K estimated |
| Australia              | 8      | 0.05        | 16604             | 58.22       | 28519                    | 14              |
| Belgium                | 25     | 0.85        | 2930              | 0.45        | 654352                   | 5583            |
| Bosnia_and_Herzegovina | 1      | 3.03        | 33                | 0.03        | 112828                   | 3419            |
| Brazil                 | 2      | 0.11        | 1824              | 0.02        | 7753752                  | 8502            |
| Croatia                | 3      | 6.00        | 50                | 0.02        | 214390                   | 12863           |
| Czech_Republic         | 107    | 37.94       | 282               | 0.04        | 759635                   | 288230          |
| Denmark                | 2307   | 10.39       | 22212             | 13.01       | 170787                   | 17738           |
| England                | 2412   | 2.13        | 113052            | 4.61        | 2450983                  | 52292           |
| Faroe_Islands          | 7      | 18.92       | 37                | 5.95        | 622                      | 118             |
| Finland                | 1      | 0.11        | 906               | 2.45        | 36919                    | 41              |
| France                 | 26     | 0.89        | 2920              | 0.11        | 2615185                  | 23286           |
| Germany                | 84     | 4.23        | 1984              | 0.11        | 1787410                  | 75677           |
| Hungary                | 1      | 0.37        | 273               | 0.08        | 329721                   | 1208            |
| Ireland                | 188    | 13.32       | 1411              | 1.31        | 107997                   | 14389           |
| Italy                  | 28     | 1.97        | 1419              | 0.07        | 2166244                  | 42745           |
| Japan                  | 9      | 0.09        | 9650              | 3.82        | 252317                   | 235             |
| Luxembourg             | 28     | 1.39        | 2019              | 4.30        | 46985                    | 652             |
| Morocco                | 1      | 1.12        | 89                | 0.02        | 445439                   | 5005            |
| Netherlands            | 71     | 1.58        | 4484              | 0.54        | 827622                   | 13105           |
| New_Zealand            | 1      | 0.09        | 1063              | 58.15       | 1828                     | 2               |
| Nigeria                | 1      | 0.45        | 224               | 0.25        | 91284                    | 408             |
| Northern_Ireland       | 36     | 1.68        | 2139              | 2.57        | 83236                    | 1401            |
| Norway                 | 38     | 4.51        | 842               | 1.66        | 50715                    | 2289            |
| Poland                 | 28     | 8.28        | 338               | 0.03        | 1330543                  | 110222          |
| Portugal               | 4      | 0.18        | 2269              | 0.53        | 431623                   | 761             |
| Romania                | 7      | 4.70        | 149               | 0.02        | 643559                   | 30234           |
| Scotland               | 768    | 6.03        | 12726             | 9.02        | 141066                   | 8513            |
| Singapore              | 6      | 0.38        | 1578              | 2.69        | 58749                    | 223             |
| Slovakia               | 3      | 8.11        | 37                | 0.02        | 191088                   | 15494           |
| South_Korea            | 4      | 0.31        | 1287              | 1.96        | 65815                    | 205             |
| Sweden                 | 31     | 2.61        | 1187              | 0.26        | 462767                   | 12086           |
| Switzerland            | 101    | 2.03        | 4973              | 1.08        | 459660                   | 9336            |
| USA                    | 9      | 0.02        | 59063             | 0.29        | 20643544                 | 3146            |
| Wales                  | 522    | 2.78        | 18791             | 11.63       | 161516                   | 4487            |

Total N439K = 6868  
(observed)

Total N439K = 763907  
(estimated)

**Table S3. Crystallographic data collection and refinement statistics, related to Figure 4.** Values in parentheses are for highest-resolution shell.

|                                        |                        |
|----------------------------------------|------------------------|
|                                        | RBD/S304/S309/ACE2     |
| <b>PDB ID</b>                          | 7L0N                   |
| <b>Data collection</b>                 |                        |
| X-ray source                           | ALS BL4.2.2            |
| Space group                            | P2 <sub>1</sub>        |
| Cell dimensions                        |                        |
| a, b, c (Å)                            | 78.0, 186.6, 194.5     |
| $\alpha$ , $\beta$ , $\gamma$ (°)      | 90, 96.4, 90           |
| Resolution (Å)                         | 48.95-2.78 (2.83-2.78) |
| R <sub>sym</sub> or R <sub>merge</sub> | 0.47 (3.03)            |
| CC <sub>1/2</sub>                      | 0.97 (0.18)            |
| I / $\sigma$ I                         | 3.3 (0.5)              |
| Completeness (%)                       | 94.8 (99.8)            |
| Redundancy                             | 7.2 (4.7)              |
|                                        |                        |
| <b>Refinement</b>                      |                        |
| Resolution (Å)                         | 2.78                   |
| No. reflections                        | 122372                 |
| R <sub>work</sub> / R <sub>free</sub>  | 0.292/0.325            |
| No. atoms                              | 26477                  |
| Mean B-factors (Å <sup>2</sup> )       | 86.1                   |
| R.m.s. deviations                      |                        |
| Bond lengths (Å)                       | 0.002                  |
| Bond angles (°)                        | 0.668                  |

**Table S4. Viral load analysis, related to Figure 5.** Parameter estimates on the link scale from the model estimating the impact of the N439K mutation on the Ct value of patients infected with SARS-CoV-2 in Scotland. Credible intervals represent 95% the shortest posterior density intervals. The difference between D614G/N439 and D614G/N439K was estimated by direct subtraction of the Hamiltonian Monte Carlo samples of the D614G/N439K estimate from the D614G/N439 estimate. Ct value did not appear strongly correlated with biological sex or age after controlling for the other factors. Patients infected with related viral genomes had correlated Ct values at testing potentially implying that there are other undescribed mutations in the genome that are affecting the viral load.

|                                                                          | Posterior mean | Lower bound of 95% shortest probability interval | Upper bound of 95% shortest probability interval |
|--------------------------------------------------------------------------|----------------|--------------------------------------------------|--------------------------------------------------|
| D614G/N439                                                               | -0.31          | -1.91                                            | 1.48                                             |
| D614G/N439K                                                              | -0.96          | -2.68                                            | 0.74                                             |
| Female biological sex                                                    | 0.05           | -0.34                                            | 0.43                                             |
| Intercept                                                                | 27.22          | 26.48                                            | 27.97                                            |
| Cluster random effect standard deviation                                 | 0.92           | 0.00                                             | 1.49                                             |
| Phylogenetic random effect standard deviation                            | 0.99           | 0.30                                             | 1.72                                             |
| Age penalised spline standard deviation                                  | 1.15           | 0.00                                             | 3.15                                             |
| Days since first case in the dataset penalised spline standard deviation | 9.78           | 4.42                                             | 16.22                                            |
| Residual standard deviation                                              | 3.91           | 3.71                                             | 4.12                                             |
| Difference between D614G/N439 and D614G/N439K                            | -0.65          | -1.22                                            | -0.07                                            |

**Table S5. Clinical severity analysis, related to Figure 5.** Parameter estimates on the link scale from the model estimating the impact of the N439K mutation on the severity of infection of patients infected with SARS-CoV-2 in Scotland. Credible intervals represent 95% the shortest posterior density intervals. Thresholds correspond to the positions of the boundaries between the different severity classes.

|                                                                          | Posterior mean | Lower bound of 95% shortest probability interval | Upper bound of 95% shortest probability interval |
|--------------------------------------------------------------------------|----------------|--------------------------------------------------|--------------------------------------------------|
| Presence of 614G                                                         | 0.06           | -1.21                                            | 1.33                                             |
| Presence of 614G and 439K                                                | 0.23           | -1.01                                            | 1.56                                             |
| Female biological sex                                                    | -0.79          | -1.02                                            | -0.55                                            |
| Threshold 1                                                              | -0.02          | -0.55                                            | 0.54                                             |
| Threshold 2                                                              | 0.87           | 0.33                                             | 1.43                                             |
| Threshold 3                                                              | 1.23           | 0.68                                             | 1.78                                             |
| Cluster random effect standard deviation                                 | 0.30           | 0.00                                             | 0.62                                             |
| Phylogenetic random effect standard deviation                            | 0.92           | 0.34                                             | 1.49                                             |
| Age penalised spline standard deviation                                  | 1.31           | 0.09                                             | 2.85                                             |
| Days since first case in the dataset penalised spline standard deviation | 3.03           | 0.81                                             | 5.36                                             |

**Table S6. Viral isolate genotypes, related to Figure 5.** Nucleotide differences between GLA1 and GLA2. SNPs determined by CoV-GLUE on consensus sequences relative to Wuhan-Hu-1 (NC\_045512.2).

| Sample | SNP     | Amino Acid Change |          |
|--------|---------|-------------------|----------|
|        |         | Gene              | Mutation |
| GLA1   | C3037T  |                   |          |
|        | C14408T | nsp12             | P323L    |
|        | A23403G | S                 | D614G    |
|        | A24388T |                   |          |
|        | T26258C | E                 | V5A      |
| GLA2   | C3037T  |                   |          |
|        | C14408T | nsp12             | P323L    |
|        | T19724C | nsp15             | V35A     |
|        | C22879A | S                 | N439K    |
|        | A23403G | S                 | D614G    |
|        | G29573T | ORF 10            | V6F      |
